# Supplementary material for: Serum metabolomic biomarkers of perceptual speed in cognitively normal and mildly impaired subjects with fasting state stratification
Source: PubMed Central journal article supplement (PMC8460824; doi:10.1038/s41598-021-98640-2), 2021-09-23
Supplement: 41598_2021_98640_MOESM7_ESM.pdf [file 41598_2021_98640_MOESM7_ESM.pdf]

Title: Serum metabolomic biomarkers of perceptual speed in cognitively normal and mildly impaired subjects with fasting state stratification

Authors: Kamil Borkowski, Ameer Y. Taha, Theresa L. Pedersen, Philip L. De Jager, David A. Bennett, Rima Kaddurah-Daouk, John W. Newman

Supplemental Table S3. Spearman  $\rho$  correlation matrix between serum lipid mediators and cognitive domains. Correlation was generated using subjects stratified by the fasting status. Significant correlations ( $p < 0.04$ ) are highlighted in blue. The numbers indicate Spearman  $\rho$ . Percent of metabolites manifesting significant correlation with cognitive domains are indicated above the table.

| General class                                    | Chemical class | Enzyme  | Parent FA    | Units      | Variable        | Fasted          |                  |                        |                  |                 |                |                                    | Non Fasted                             |                                    |                                    |                                    |         |
|--------------------------------------------------|----------------|---------|--------------|------------|-----------------|-----------------|------------------|------------------------|------------------|-----------------|----------------|------------------------------------|----------------------------------------|------------------------------------|------------------------------------|------------------------------------|---------|
|                                                  |                |         |              |            |                 | 4%              | 2%               | 2%                     | 8%               | 2%              | 2%             | 1%                                 | 1%                                     | 0%                                 | 10%                                | 2%                                 | 5%      |
|                                                  |                |         |              |            |                 | 9%              | 6%               | 6%                     | 3%               | 3%              | 0%             | 38%                                | 25%                                    | 0%                                 | 16%                                | 25%                                | 0%      |
| % OxyEndo<br>% Bile Acids<br>% steroids<br>Total |                |         |              |            |                 | 0%              | 0%               | 0%                     | 0%               | 0%              | 0%             | 25%                                | 0%                                     | 0%                                 | 0%                                 |                                    |         |
|                                                  |                |         |              |            |                 | 5%              | 3%               | 3%                     | 6%               | 2%              | 2%             | 10%                                | 7%                                     | 2%                                 | 10%                                | 8%                                 | 3%      |
|                                                  |                |         |              |            |                 | Episodic memory | Global cognition | Perceptual orientation | Perceptual speed | Semantic memory | Working memory | Spearman $\rho$ Non-Fasted cogn_ep | Spearman $\rho$ Non-Fasted cogn_global | Spearman $\rho$ Non-Fasted cogn_ps | Spearman $\rho$ Non-Fasted cogn_se | Spearman $\rho$ Non-Fasted cogn_wo |         |
| OxyEndo                                          | TX             | COX1    | AA           | nM         | TXB2            | 0.017           | -0.054           | 0.0005                 | 0.08             | -0.25           | -0.079         | 0.066                              | 0.1                                    | 0.074                              | 0.12                               | 0.2                                | -0.031  |
| OxyEndo                                          | PGs            | COX2    | AA           | nM         | PGE2            | 0.098           | -0.025           | -0.052                 | 0.064            | -0.17           | -0.11          | -0.0052                            | 0.03                                   | -0.06                              | 0.084                              | 0.15                               | 0.026   |
| OxyEndo                                          | PGs            | COX2    | AA           | nM         | PGD2            | 0.14            | 0.16             | 0.12                   | 0.25             | 0.088           | 0.021          | 0.0059                             | 0.052                                  | -0.024                             | -0.054                             | 0.17                               | 0.028   |
| OxyEndo                                          | PGs            | COX2    | AA           | nM         | PGF2a           | 0.18            | 0.18             | 0.17                   | 0.13             | 0.04            | 0.031          | -0.018                             | -0.028                                 | 0.024                              | 0.055                              | -0.051                             | -0.11   |
| OxyEndo                                          | PGs            | COX2    | EPA          | nM         | PEG3            | -0.082          | -0.046           | -0.028                 | -0.099           | -0.015          | -0.021         | 0.078                              | 0.052                                  | -0.0075                            | -0.053                             | -0.0094                            | 0.052   |
| OxyEndo                                          | PGs            | Auto-ox | AA           | nM         | F2-isoP         | 0.13            | 0.17             | 0.19                   | 0.1              | 0.12            | 0.12           | -0.029                             | -0.0034                                | 0.039                              | 0.087                              | -0.074                             | -0.047  |
| OxyEndo                                          | PG-Gly         | COX2    | AA           | nM         | PGF2a-1G        | 0.03            | -0.024           | -0.3                   | -0.075           | 0.048           | -0.063         | -0.091                             | -0.087                                 | -0.05                              | 0.031                              | -0.071                             | -0.088  |
| OxyEndo                                          | Diol           | LOX     | AA           | nM         | LTB4            | -0.31           | -0.23            | -0.041                 | -0.032           | -0.2            | -0.03          | 0.043                              | 0.045                                  | -0.042                             | 0.039                              | -0.023                             | 0.068   |
| OxyEndo                                          | Diol           | LOX     | AA           | nM         | 5_15-DIHETE     | -0.088          | -0.032           | 0.084                  | -0.0091          | -0.028          | 0.06           | -0.0058                            | 0.043                                  | 0.14                               | 0.021                              | 0.094                              | -0.049  |
| OxyEndo                                          | Triol          | LOX     | LA           | nM         | 9_12_13-TriHOME | -0.065          | -0.091           | -0.19                  | -0.059           | -0.21           | 0.012          | 0.11                               | 0.076                                  | 0.059                              | 0.075                              | 0.031                              | -0.13   |
| OxyEndo                                          | vic-Diol       | sEH     | OA           | nM         | 9_10-e-DIHO     | -0.063          | 0.017            | -0.019                 | 0.061            | -0.04           | 0.13           | 0.077                              | 0.06                                   | -0.029                             | 0.11                               | 0.074                              | -0.045  |
| OxyEndo                                          | vic-Diol       | sEH     | LA           | nM         | 12_13-DIHOME    | 0.067           | 0.048            | 0.044                  | -0.046           | -0.16           | 0.13           | -0.0003                            | 0.0075                                 | 0.04                               | 0.033                              | -0.025                             | -0.015  |
| OxyEndo                                          | vic-Diol       | sEH     | LA           | nM         | 9_10-DIHOME     | -0.026          | -0.067           | -0.078                 | -0.076           | -0.22           | 0.067          | 0.038                              | 0.016                                  | 0.0076                             | 0.015                              | -0.064                             | -0.0086 |
| OxyEndo                                          | vic-Diol       | sEH     | aLA          | nM         | 15_16-DIHOME    | 0.093           | 0.062            | 0.1                    | -0.089           | -0.15           | 0.15           | -0.023                             | 0.0061                                 | 0.0012                             | -0.0086                            | 0.013                              | -0.028  |
| OxyEndo                                          | vic-Diol       | sEH     | aLA          | nM         | 12_13-DIHOME    | -0.094          | -0.088           | 0.2                    | -0.15            | -0.16           | 0.028          | 0.21                               | 0.22                                   | 0.039                              | 0.098                              | 0.098                              | 0.13    |
| OxyEndo                                          | vic-Diol       | sEH     | AA           | nM         | 9_10-DIHOME     | 0.0063          | -0.025           | -0.09                  | -0.1             | -0.16           | 0.027          | -0.011                             | 0.017                                  | 0.019                              | -0.012                             | -0.045                             | 0.037   |
| OxyEndo                                          | vic-Diol       | sEH     | AA           | nM         | 14_15-DIHETE    | 0.032           | 0.023            | -0.14                  | -0.09            | -0.04           | 0.16           | -0.013                             | 0.0007                                 | -0.091                             | 0.13                               | 0.13                               | -0.053  |
| OxyEndo                                          | vic-Diol       | sEH     | AA           | nM         | 8_9-DIHETE      | -0.085          | -0.097           | -0.091                 | -0.13            | -0.21           | 0.069          | -0.031                             | -0.033                                 | -0.059                             | 0.041                              | 0.055                              | -0.069  |
| OxyEndo                                          | vic-Diol       | sEH     | AA           | nM         | 5_6-DIHETE      | -0.17           | -0.1             | 0.038                  | -0.022           | -0.075          | 0.049          | 0.14                               | 0.16                                   | 0.099                              | 0.13                               | 0.11                               | 0.09    |
| OxyEndo                                          | vic-Diol       | sEH     | EPA          | nM         | 14_15-DIHETE    | -0.093          | -0.087           | 0.18                   | -0.27            | -0.078          | 0.15           | 0.032                              | 0.017                                  | 0.012                              | 0.12                               | -0.08                              | -0.073  |
| OxyEndo                                          | vic-Diol       | sEH     | EPA          | nM         | 17_18-DIHETE    | -0.053          | -0.049           | 0.11                   | -0.24            | -0.11           | 0.12           | 0.04                               | 0.058                                  | -0.035                             | 0.14                               | 0.0042                             | 0.014   |
| OxyEndo                                          | vic-Diol       | sEH     | DHA          | nM         | 19_20-DIHOMEPE  | -0.17           | -0.18            | 0.12                   | -0.31            | -0.26           | 0.029          | 0.014                              | 0.063                                  | -0.018                             | 0.2                                | 0.079                              | 0.0052  |
| OxyEndo                                          | R-OH           | LOX     | LA           | nM         | 13-HODE         | 0.099           | 0.037            | -0.0097                | -0.064           | -0.23           | 0.11           | -0.029                             | 0.01                                   | 0.038                              | 0.11                               | -0.02                              | -0.019  |
| OxyEndo                                          | R-OH           | LOX     | LA           | nM         | 9-HODE          | 0.12            | 0.035            | -0.078                 | -0.035           | -0.18           | 0.073          | 0.016                              | 0.036                                  | -0.0021                            | 0.12                               | 0.017                              | 0.015   |
| OxyEndo                                          | R-OH           | LOX     | aLA          | nM         | 13-HOTE         | 0.08            | 0.073            | 0.055                  | -0.017           | -0.1            | 0.16           | -0.028                             | 0.025                                  | 0.066                              | 0.088                              | 0.021                              | -0.0026 |
| OxyEndo                                          | R-OH           | LOX     | aLA          | nM         | 9-HOTE          | 0.12            | 0.081            | 0.041                  | -0.085           | -0.12           | 0.13           | 0.05                               | 0.078                                  | 0.0089                             | 0.1                                | 0.066                              | 0.01    |
| OxyEndo                                          | R-OH           | CYP     | AA           | nM         | 20-HETE         | -0.1            | 0.053            | 0.0078                 | 0.11             | 0.18            | -0.011         | -0.029                             | -0.073                                 | 0.0091                             | 0.0075                             | 0.026                              | -0.2    |
| OxyEndo                                          | R-OH           | LOX     | AA           | nM         | 15-HETE         | 0.019           | -0.031           | -0.026                 | -0.022           | -0.16           | -0.026         | -0.027                             | -0.036                                 | 0.015                              | 0.017                              | 0.0014                             | -0.023  |
| OxyEndo                                          | R-OH           | LOX     | AA           | nM         | 12-HETE         | 0.0067          | -0.049           | 0.039                  | -0.09            | -0.21           | 0.0017         | 0.0035                             | -0.023                                 | -0.019                             | -0.043                             | 0.028                              | -0.0046 |
| OxyEndo                                          | R-OH           | LOX     | AA           | nM         | 11-HETE         | 0.15            | 0.059            | -0.073                 | 0.059            | -0.14           | 0.011          | -0.022                             | -0.022                                 | 0.042                              | 0.0063                             | 0.077                              | -0.062  |
| OxyEndo                                          | R-OH           | LOX     | AA           | nM         | 9-HETE          | -0.044          | -0.08            | -0.21                  | -0.0013          | -0.14           | -0.01          | -0.089                             | -0.066                                 | -0.053                             | 0.11                               | -0.028                             | -0.044  |
| OxyEndo                                          | R-OH           | LOX     | AA           | nM         | 5-HETE          | -0.13           | -0.091           | -0.13                  | 0.11             | -0.025          | 0.0046         | -0.036                             | -0.038                                 | 0.053                              | 0.046                              | -0.064                             | -0.021  |
| OxyEndo                                          | R-OH           | LOX     | EPA          | nM         | 15-HEPE         | 0.097           | 0.16             | 0.14                   | 0.023            | 0.073           | 0.12           | 0.09                               | 0.12                                   | 0.1                                | 0.2                                | 0.051                              | 0.011   |
| OxyEndo                                          | R-OH           | LOX     | EPA          | nM         | 12-HEPE         | 0.062           | 0.0017           | 0.11                   | -0.15            | -0.21           | 0.038          | -0.019                             | -0.03                                  | -0.011                             | 0.024                              | -0.011                             | -0.019  |
| OxyEndo                                          | R-OH           | LOX     | EPA          | nM         | 5-HEPE          | 0.068           | 0.035            | 0.11                   | -0.084           | -0.0083         | -0.017         | -0.0053                            | 0.0004                                 | 0.11                               | 0.16                               | -0.053                             | -0.13   |
| OxyEndo                                          | R-OH           | LOX     | DHA          | nM         | 17-HDoHE        | -0.053          | -0.091           | 0.097                  | -0.18            | -0.21           | -0.0028        | -0.038                             | -0.032                                 | 0.027                              | -0.018                             | 0.009                              | -0.019  |
| OxyEndo                                          | R-OH           | LOX     | DHA          | nM         | 14-HDoHE        | -0.0074         | -0.038           | 0.097                  | -0.12            | -0.21           | 0.033          | -0.018                             | -0.037                                 | 0.025                              | -0.015                             | -0.014                             | -0.041  |
| OxyEndo                                          | R-OH           | LOX     | DHA          | nM         | 4-HDoHE         | -0.014          | -0.05            | 0.034                  | -0.15            | -0.069          | 0.0064         | 0.073                              | 0.12                                   | 0.0038                             | 0.18                               | 0.032                              | 0.079   |
| OxyEndo                                          | R=O            | ADH     | LA           | nM         | 9-KODE          | -0.019          | 0.013            | -0.0085                | 0.067            | -0.041          | 0.11           | 0.02                               | 0.025                                  | -0.11                              | 0.13                               | 0.05                               | -0.021  |
| OxyEndo                                          | Epox           | CYP     | LA           | nM         | 12(13)-EpOME    | 0.078           | 0.14             | 0.099                  | 0.19             | -0.012          | 0.17           | 0.059                              | 0.11                                   | 0.058                              | 0.11                               | 0.031                              | 0.1     |
| OxyEndo                                          | Epox           | CYP     | LA           | nM         | 9(10)-EpODE     | 0.018           | 0.012            | 0.06                   | 0.017            | -0.13           | 0.13           | 0.05                               | 0.068                                  | 0.074                              | 0.13                               | -0.016                             | 0.044   |
| OxyEndo                                          | Epox           | CYP     | aLA          | nM         | 15(16)-EpODE    | 0.27            | 0.23             | 0.15                   | 0.057            | 0.017           | 0.33           | -0.013                             | 0.023                                  | -0.054                             | 0.074                              | 0.021                              | 0.041   |
| OxyEndo                                          | Epox           | CYP     | aLA          | nM         | 12(13)-EpODE    | -0.13           | -0.021           | 0.04                   | -0.075           | -0.053          | 0.15           | 0.073                              | 0.13                                   | -0.033                             | 0.064                              | 0.18                               | 0.065   |
| OxyEndo                                          | Epox           | CYP     | aLA          | nM         | 9(10)-EpODE     | -0.06           | -0.048           | 0.015                  | 0.034            | -0.095          | -0.035         | -0.0065                            | -0.045                                 | -0.07                              | 0.034                              | -0.083                             | -0.052  |
| OxyEndo                                          | Epox           | CYP     | AA           | nM         | 14(15)-EpETRE   | 0.053           | 0.08             | 0.015                  | 0.13             | 0.062           | 0.12           | 0.0082                             | 0.046                                  | 0.069                              | 0.097                              | 0.12                               | -0.012  |
| OxyEndo                                          | PUFA           | Diet    | Rel Abs      | LA_screen  | 0.005           | 0.11            | 0.016            | 0.1                    | 0.048            | 0.2             | -0.03          | 0.0014                             | -0.042                                 | 0.25                               | 0.1                                | -0.1                               |         |
| OxyEndo                                          | PUFA           | D5D     | Rel Abs      | ALA_screen | 0.087           | 0.14            | 0.07             | 0.031                  | 0.024            | 0.12            | -0.029         | -0.015                             | -0.02                                  | 0.17                               | 0.052                              | -0.1                               |         |
| OxyEndo                                          | PUFA           | D5D     | Rel Abs      | AA_screen  | 0.11            | 0.19            | 0.13             | 0.26                   | 0.13             | 0.12            | -0.037         | -0.09                              | -0.019                                 | 0.1                                | 0.013                              | -0.21                              |         |
| OxyEndo                                          | PUFA           | D6D     | Rel Abs      | EPA_screen | 0.2             | 0.2             | 0.22             | 0.025                  | 0.064            | 0.099           | -0.053         | -0.0059                            | 0.037                                  | 0.22                               | 0.058                              | -0.14                              |         |
| OxyEndo                                          | PUFA           | D6D     | Rel Abs      | DHA_screen | 0.077           | 0.12            | 0.25             | 0.028                  | 0.036            | 0.036           | -0.016         | 0.026                              | 0.075                                  | 0.25                               | 0.077                              | -0.14                              |         |
| OxyEndo                                          | Acyl-EA        | PLD     | OA           | nM         | OEa             | -0.069          | -0.099           | -0.035                 | -0.16            | -0.21           | 0.012          | 0.034                              | 0.03                                   | 0.05                               | 0.1                                | 0.091                              | -0.11   |
| OxyEndo                                          | Acyl-EA        | PLD     | LA           | nM         | LEa             | -0.064          | -0.11            | -0.13                  | -0.13            | -0.1            | 0.0016         | -0.019                             | -0.023                                 | -0.06                              | 0.046                              | 0.034                              | -0.03   |
| OxyEndo                                          | Acyl-EA        | PLD     | aLA          | nM         | aLEa            | -0.1            | -0.14            | 0.039                  | -0.21            | -0.12           | -0.063         | 0.041                              | 0.067                                  | -0.02                              | 0.061                              | 0.12                               | 0.011   |
| OxyEndo                                          | Acyl-EA        | PLD     | DGLA         | nM         | DGLEa           | -0.15           | -0.1             | -0.23                  | -0.073           | -0.06           | 0.033          | -0.02                              | 0.031                                  | 0.0076                             | 0.16                               | 0.089                              | 0.031   |
| OxyEndo                                          | Acyl-EA        | PLD     | AA           | nM         | AEa             | -0.098          | -0.062           | -0.045                 | -0.064           | -0.096          | 0.086          | -0.11                              | -0.097                                 | -0.015                             | 0.071                              | -0.064                             | -0.049  |
| OxyEndo                                          | Acyl-EA        | PLD     | Adrenic acid | nM         | DEa             | -0.15           | -0.076           | -0.095                 | 0.077            | -0.073          | 0.062          | 0.036                              | -0.077                                 | -0.035                             | -0.032                             | -0.039                             | -0.21   |
| OxyEndo                                          | Acyl-EA        | PLD     | DHA          | nM         | DHEa            | -0.027          | -0.04            | 0.11                   | -0.18            | -0.026          | -0.027         | 0.061                              | 0.045                                  | 0.018                              | 0.17                               | -0.032                             | -0.043  |
| OxyEndo                                          | Acyl-EA        | PLD     | POA          | Rel Abs    | POEA_Screen     | -0.11           | -0.058           | -0.016                 | -0.13            | -0.075          | 0.12           | 0.018                              | 0.045                                  | 0.067                              | 0.24                               | 0.032                              | -0.075  |
| OxyEndo                                          | Acyl-EA        | PLD     | EPA          | Rel Abs    | EPA_Screen      | 0.053           | 0.071            | -0.0096                | -0.12            | 0.083           | 0.039          | -0.038                             | -0.018                                 | 0.1                                | 0.18                               | -0.036                             | -0.13   |
| OxyEndo                                          | Acyl-Gly       | FAAH    | OA           | nM         | NO-Gly          | -0.079          | -0.1             | -0.0008                | -0.12            | -0.15           | -0.084         | 0.013                              | 0.012                                  | -0.034                             | 0.13                               | 0.1                                | -0.052  |
| OxyEndo                                          | Acyl-Gly       | FAAH    | AA           | nM         | NA-Gly          | 0.14            | 0.16             | -0.028                 | 0.23             | 0.14            | 0.098          | -0.074                             | -0.087                                 | 0.098                              | 0.051                              | -0.022                             | -0.13   |
| OxyEndo                                          | MAG            | Lipase  | LA           | nM         | 1-LG            | 0.078           | 0.08             | -0.074                 | 0.13             | 0.053           | -0.021         | -0.0075                            | -0.067                                 | -0.055                             |                                    |                                    |         |

Continuation of Supplemental Table S2.

| General class | Chemical class                 | Enzyme               | Parent FA | Units | Variable                | Episodic memory | Global cognition | Perceptual orientation | Perceptual speed | Semantic memory | Working memory | Spearman $\rho$ Non-Fasted cogn_ep | Spearman $\rho$ Non-Fasted cogn_global | Spearman $\rho$ Non-Fasted cogn_po | Spearman $\rho$ Non-Fasted cogn_js | Spearman $\rho$ Non-Fasted cogn_se | Spearman $\rho$ Non-Fasted cogn_wo |
|---------------|--------------------------------|----------------------|-----------|-------|-------------------------|-----------------|------------------|------------------------|------------------|-----------------|----------------|------------------------------------|----------------------------------------|------------------------------------|------------------------------------|------------------------------------|------------------------------------|
| OxyEndo       | -                              | -                    | -         | Ratio | 9_10-DiHODE/9(10)-EpODE | 0.1             | 0.024            | -0.056                 | -0.084           | -0.041          | -0.04          | -0.066                             | 0.015                                  | 0.069                              | 0.0007                             | 0.04                               | 0.047                              |
| NSAD          | NSAID                          | Treatment            | -         | nM    | Ibuprofen               | -0.13           | -0.14            | -0.15                  | 0.0081           | -0.056          | -0.19          | -0.1                               | -0.11                                  | -0.012                             | -0.0086                            | -0.05                              | -0.13                              |
| NSAD          | NSAID                          | Treatment            | -         | nM    | Aspirin                 | 0.044           | -0.0008          | 0.081                  | 0.0069           | -0.026          | -0.12          | 0.018                              | 0.051                                  | 0.023                              | 0.085                              | -0.055                             | 0.13                               |
| NSAD          | NSAID                          | Treatment            | -         | nM    | Acetaminophen           | -0.052          | -0.13            | -0.024                 | -0.046           | -0.16           | -0.1           | 0.0038                             | -0.083                                 | -0.021                             | -0.14                              | -0.14                              | -0.042                             |
| Bile Acid     | Cyp27A1; CYP8B1                | 1 $\alpha$ -BA       | -         | nM    | CA                      | 0.21            | 0.17             | 0.16                   | 0.089            | 0.057           | -0.022         | 0.15                               | 0.096                                  | -0.11                              | 0.14                               | 0.14                               | -0.093                             |
| Bile Acid     | Cholesterol                    | Cyp27A1              | -         | nM    | CDCA                    | <b>-0.27</b>    | 0.2              | 0.061                  | 0.11             | 0.11            | -0.047         | 0.094                              | 0.15                                   | -0.0068                            | <b>0.2</b>                         | <b>0.19</b>                        | 0.043                              |
| Bile Acid     | CDCA                           | Microbiome           | -         | nM    | UDCA                    | -0.023          | -0.096           | <b>-0.25</b>           | -0.067           | -0.013          | -0.13          | -0.083                             | -0.11                                  | 0.02                               | -0.12                              | <b>-0.047</b>                      | -0.078                             |
| Bile Acid     | 1 $\alpha$ -BA Conj            | Microbiome           | -         | nM    | DCA                     | 0.2             | 0.17             | -0.086                 | 0.19             | 0.21            | -0.029         | 0.014                              | 0.12                                   | 0.11                               | 0.078                              | <b>0.2</b>                         | 0.1                                |
| Bile Acid     | CDCA                           | Cyp27A1              | -         | nM    | w-MCA                   | 0.091           | 0.068            | -0.029                 | 0.07             | 0.15            | -0.028         | 0.1                                | 0.14                                   | 0.081                              | 0.066                              | 0.15                               | 0.063                              |
| Bile Acid     | CA                             | BAT                  | -         | nM    | TCA                     | 0.071           | 0.048            | 0.08                   | -0.04            | -0.05           | 0.15           | -0.086                             | -0.096                                 | -0.04                              | -0.026                             | -0.11                              | -0.046                             |
| Bile Acid     | CDCA                           | BAT                  | -         | nM    | TDCA                    | <b>0.058</b>    | 0.006            | 0.052                  | -0.1             | -0.071          | 0.11           | -0.075                             | -0.14                                  | -0.1                               | -0.084                             | <b>-0.2</b>                        | -0.1                               |
| Bile Acid     | DCA                            | BAT                  | -         | nM    | TDCA                    | -0.035          | -0.044           | 0.014                  | -0.013           | -0.03           | 0.031          | <b>-0.18</b>                       | -0.14                                  | 0.0071                             | -0.09                              | -0.12                              | -0.016                             |
| Bile Acid     | BAT                            | 2 $\alpha$ -BA Conj  | -         | nM    | TLCA                    | 0.013           | -0.033           | -0.023                 | -0.072           | -0.11           | 0.067          | <b>-0.28</b>                       | <b>-0.29</b>                           | -0.086                             | <b>-0.2</b>                        | <b>-0.27</b>                       | -0.059                             |
| Bile Acid     | CA                             | BAT                  | -         | nM    | GCA                     | 0.18            | 0.15             | 0.13                   | 0.018            | 0.1             | 0.11           | -0.11                              | -0.073                                 | -0.052                             | 0.027                              | -0.051                             | -0.019                             |
| Bile Acid     | CDCA                           | BAT                  | -         | nM    | GDCA                    | 0.22            | 0.19             | 0.057                  | 0.021            | 0.18            | 0.098          | -0.05                              | -0.082                                 | -0.073                             | -0.025                             | -0.13                              | -0.04                              |
| Bile Acid     | UDCA                           | BAT                  | -         | nM    | GDCA                    | 0.21            | 0.17             | 0.0077                 | 0.015            | 0.22            | 0.053          | -0.02                              | -0.045                                 | -0.15                              | -0.056                             | -0.014                             | 0.0001                             |
| Bile Acid     | DCA                            | BAT                  | -         | nM    | GDCA                    | 0.15            | 0.14             | -0.011                 | 0.15             | 0.16            | 0.045          | <b>-0.21</b>                       | -0.13                                  | 0.0098                             | -0.08                              | -0.051                             | 0.021                              |
| Bile Acid     | LCA                            | BAT                  | -         | nM    | GLCA                    | 0.11            | 0.063            | -0.017                 | -0.012           | 0.059           | -0.024         | -0.13                              | -0.056                                 | -0.037                             | -0.062                             | 0.016                              | 0.071                              |
| Bile Acid     | BAT                            | 1 $\alpha$ -BA Conj  | -         | nM    | T- $\alpha$ -MCA        | <b>-0.29</b>    | <b>-0.31</b>     | <b>-0.043</b>          | <b>-0.28</b>     | <b>-0.26</b>    | -0.066         | -0.081                             | -0.14                                  | -0.067                             | -0.16                              | -0.15                              | 0.0093                             |
| Bile Acid     | -                              | -                    | -         | Ratio | GUOCA/UDCA              | <b>0.3</b>      | <b>0.32</b>      | <b>0.33</b>            | 0.081            | 0.24            | 0.2            | 0.047                              | 0.049                                  | -0.12                              | 0.072                              | 0.0068                             | 0.052                              |
| Bile Acid     | -                              | -                    | -         | Ratio | GDCA/CA                 | -0.11           | -0.077           | -0.14                  | -0.0008          | 0.045           | 0.05           | <b>-0.28</b>                       | <b>-0.18</b>                           | 0.089                              | -0.16                              | -0.13                              | 0.072                              |
| Bile Acid     | -                              | -                    | -         | Ratio | TDCA/CA                 | -0.17           | -0.15            | -0.13                  | -0.084           | -0.049          | 0.05           | <b>-0.26</b>                       | <b>-0.19</b>                           | 0.048                              | -0.15                              | -0.17                              | 0.027                              |
| Bile Acid     | -                              | -                    | -         | Ratio | TLCA/CDCA               | -0.16           | -0.14            | -0.085                 | -0.13            | -0.14           | 0.088          | <b>-0.24</b>                       | <b>-0.27</b>                           | -0.025                             | <b>-0.24</b>                       | <b>-0.28</b>                       | -0.057                             |
| Bile Acid     | -                              | -                    | -         | Ratio | GDCA/DCA                | -0.038          | -0.047           | 0.12                   | -0.097           | -0.093          | 0.042          | <b>-0.23</b>                       | <b>-0.27</b>                           | -0.14                              | -0.16                              | <b>-0.3</b>                        | -0.062                             |
| Bile Acid     | -                              | -                    | -         | Ratio | GCA/CA                  | -0.062          | -0.057           | -0.053                 | -0.091           | 0.013           | 0.093          | <b>-0.22</b>                       | -0.15                                  | 0.04                               | -0.092                             | -0.13                              | 0.075                              |
| Bile Acid     | -                              | -                    | -         | Ratio | TCA/CA                  | -0.1            | -0.11            | -0.041                 | -0.11            | -0.084          | 0.071          | <b>-0.21</b>                       | -0.16                                  | 0.021                              | -0.099                             | -0.16                              | 0.018                              |
| Bile Acid     | -                              | -                    | -         | Ratio | DCA/CA                  | -0.034          | 0.011            | -0.2                   | 0.074            | 0.16            | 0.091          | -0.19                              | -0.062                                 | 0.15                               | -0.089                             | -0.091                             | 0.13                               |
| Bile Acid     | -                              | -                    | -         | Ratio | TDCA/DCA                | -0.14           | -0.17            | 0.049                  | -0.19            | -0.23           | 0.053          | <b>-0.18</b>                       | <b>-0.22</b>                           | -0.08                              | -0.12                              | <b>-0.25</b>                       | -0.081                             |
| Bile Acid     | -                              | -                    | -         | Ratio | (GDCA+GLCA)/(TDCA+TLCA) | 0.2             | 0.16             | 0.022                  | -0.063           | 0.15            | 0.017          | <b>0.18</b>                        | <b>0.19</b>                            | 0.011                              | 0.14                               | 0.15                               | 0.098                              |
| Bile Acid     | -                              | -                    | -         | Ratio | GDCA/CDCA               | -0.14           | -0.11            | -0.0041                | -0.22            | -0.093          | 0.18           | -0.13                              | <b>-0.2</b>                            | -0.034                             | <b>-0.24</b>                       | <b>-0.28</b>                       | -0.054                             |
| Bile Acid     | -                              | -                    | -         | Ratio | GLCA/CDCA               | -0.17           | -0.16            | -0.11                  | -0.16            | -0.065          | 0.032          | -0.16                              | -0.14                                  | 0.022                              | -0.19                              | -0.14                              | 0.027                              |
| Bile Acid     | -                              | -                    | -         | Ratio | TDCA/TLCA               | -0.029          | -0.053           | 0.0025                 | 0.055            | 0.012           | -0.1           | 0.064                              | 0.14                                   | 0.075                              | 0.1                                | 0.13                               | 0.095                              |
| Bile Acid     | -                              | -                    | -         | Ratio | GCA/GDCA                | 0.077           | 0.058            | 0.2                    | -0.09            | -0.06           | 0.1            | 0.06                               | 0.006                                  | -0.11                              | 0.094                              | -0.028                             | -0.061                             |
| Bile Acid     | -                              | -                    | -         | Ratio | CA/CDCA                 | -0.065          | -0.053           | 0.16                   | -0.034           | -0.15           | -0.023         | 0.11                               | -0.016                                 | -0.12                              | -0.0093                            | 0.0069                             | -0.15                              |
| Bile Acid     | -                              | -                    | -         | Ratio | GDCA/GLCA               | 0.03            | 0.033            | 0.083                  | -0.0095          | -0.023          | 0.091          | 0.066                              | -0.012                                 | -0.0069                            | 0.028                              | -0.09                              | -0.09                              |
| Bile Acid     | -                              | -                    | -         | Ratio | GDCA/GLCA               | 0.061           | 0.064            | -0.021                 | 0.13             | 0.02            | 0.11           | -0.068                             | -0.029                                 | 0.038                              | 0.012                              | -0.02                              | 0.033                              |
| Steroids      | 11-Deoxy-CRTL; CRTN            | 11-beta-HSD; Cyp11B1 | -         | nM    | CRTL                    | -0.021          | -0.0032          | -0.046                 | -0.052           | 0.15            | 0.021          | -0.0089                            | -0.07                                  | -0.071                             | -0.066                             | -0.023                             | -0.067                             |
| Steroids      | CRTL                           | 11-beta-HSD          | -         | nM    | CRTN                    | -0.023          | -0.012           | -0.016                 | -0.12            | 0.024           | 0.11           | -0.015                             | -0.062                                 | -0.082                             | -0.071                             | -0.038                             | -0.025                             |
| Steroids      | 11-Deoxy-CRTN                  | Cyp11B1              | -         | nM    | CRCTN                   | -0.044          | -0.06            | -0.054                 | -0.13            | 0.14            | -0.078         | -0.0018                            | -0.051                                 | -0.055                             | -0.076                             | 0.012                              | -0.048                             |
| Steroids      | 17OH-Prog; 11-Deoxy-CRTN       | CYP8B1               | -         | nM    | 11-Deoxy-CRTL           | -0.073          | -0.016           | 0.099                  | 0.087            | 0.059           | 0.088          | 0.019                              | -0.052                                 | -0.065                             | -0.13                              | -0.051                             | -0.11                              |
| Steroids      | -                              | -                    | -         | nM    | DHEAS                   | -0.061          | -0.01            | 0.0026                 | 0.0047           | 0.17            | 0.067          | 0.02                               | 0.032                                  | 0.0046                             | 0.093                              | 0.019                              | -0.055                             |
| Steroids      | 11-Deoxy-CRTL; Androstenedione | 3-beta-HSD           | -         | nM    | TEST                    | 0.024           | 0.074            | -0.011                 | 0.039            | -0.023          | 0.23           | 0.053                              | 0.025                                  | -0.012                             | -0.014                             | -0.0075                            | -0.024                             |
| Steroids      | PROG                           | 3-beta-HSD           | -         | nM    | 17OH-PROG               | 0.018           | 0.035            | 0.092                  | 0.013            | 0.05            | 0.11           | 0.054                              | 0.017                                  | <b>-0.2</b>                        | 0.016                              | 0.027                              | -0.049                             |
| Steroids      | -                              | -                    | -         | Ratio | Tes/Prog                | -0.041          | 0.0086           | -0.11                  | 0.028            | -0.084          | 0.18           | 0.036                              | 0.021                                  | <b>0.18</b>                        | -0.028                             | -0.042                             | -0.053                             |
